# Supplementary material for: Electronic and transport properties of porous graphenes: two-dimensional benzo- and aza-fused π-conjugated-microporous-polymer sheets and boron–nitrogen co-doped derivatives
Source: Royal Society of Chemistry journal article supplement (doi:10.1039/c3tc32363c), 2014-01-01
Supplement: c3tc32363c1.pdf [file c3tc32363c1.pdf]

## Electronic Supplementary Information

### **Electronic and Transport Properties of Porous Graphenes: Two-Dimensional Benzo- and Aza-fused $\pi$ -Conjugated-Microporous-Polymers Sheets and Boron-Nitrogen Co-doped Derivatives**

Zhao-Di Yang <sup>a,c</sup> Wenzhi Wu <sup>b,c</sup> and Xiao Cheng Zeng<sup>c\*</sup>

*<sup>a</sup>Key Laboratory of Green Chemical Engineering and Technology of College of Heilongjiang Province, College of Chemical and Environmental Engineering, Harbin University of Science and Technology, Harbin 150040, China*

*<sup>b</sup>State Key Laboratory of Mechanics and Control of Mechanical Structures and Key Laboratory for Intelligent Nano Materials and Devices of Ministry of Education University of Aeronautics and Astronautics, Nanjing 210016, China*

*<sup>c</sup>Department of Chemistry, University of Nebraska-Lincoln, Lincoln, Nebraska, 68588, USA*

\*E-mail: xzeng1@unl.edu

**Figure S1.** Computed transmission spectra and the corresponding DOS of left electrode and right electrode at different bias for (a) Benzo-CMP, (b) Aza-CMP, (c) *cis*-BN-Benzo-CMP, (d) *trans*-BN-Benzo-CMP, and (e) *cis*-BN-Aza-CMP.

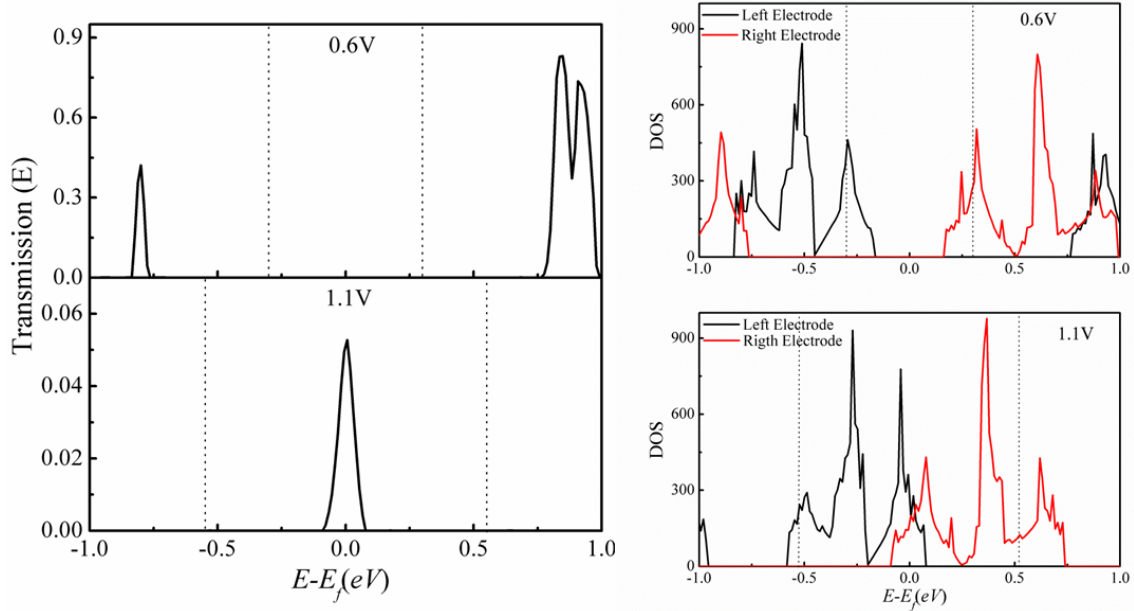

(a) Benzo-CMP

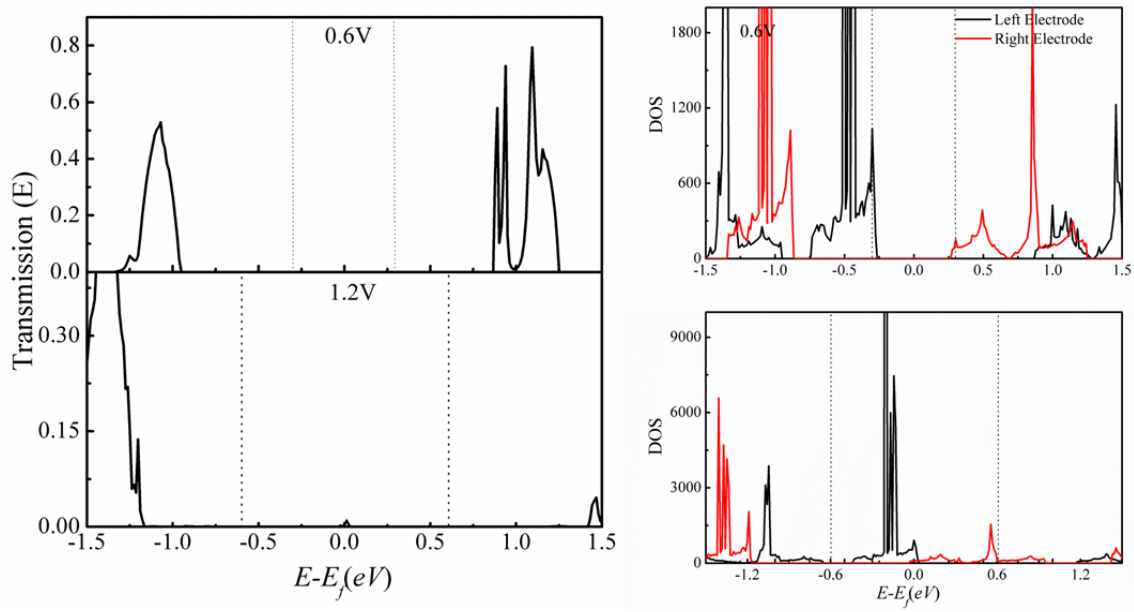

(b) Aza-CMP

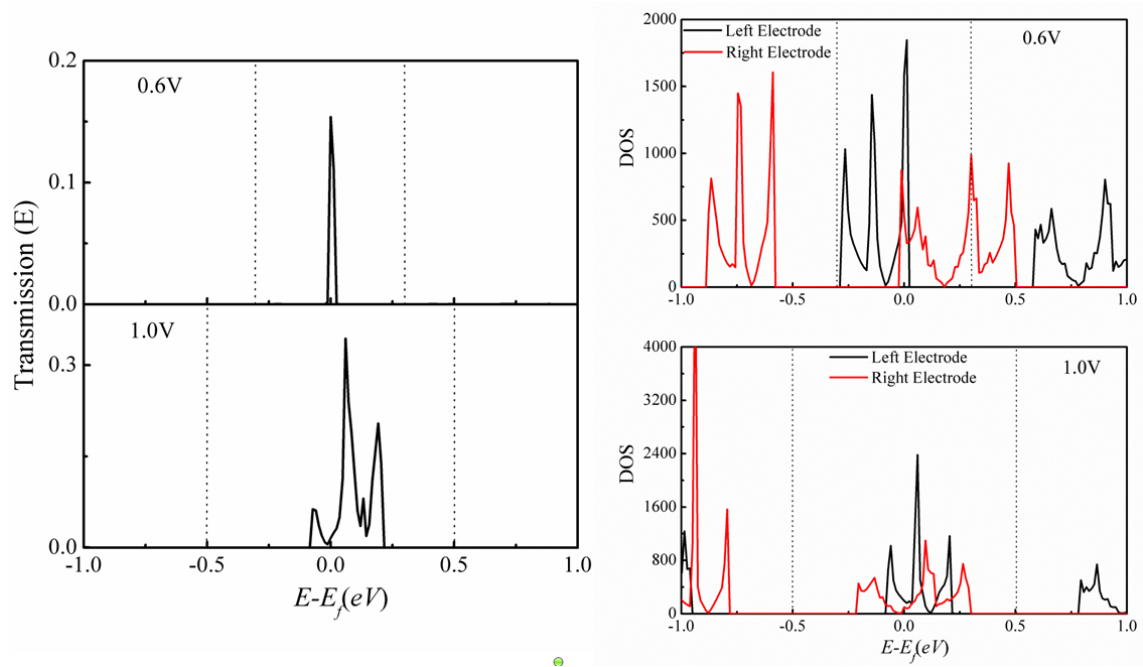

(c) *cis*-BN-Benzo-CMP

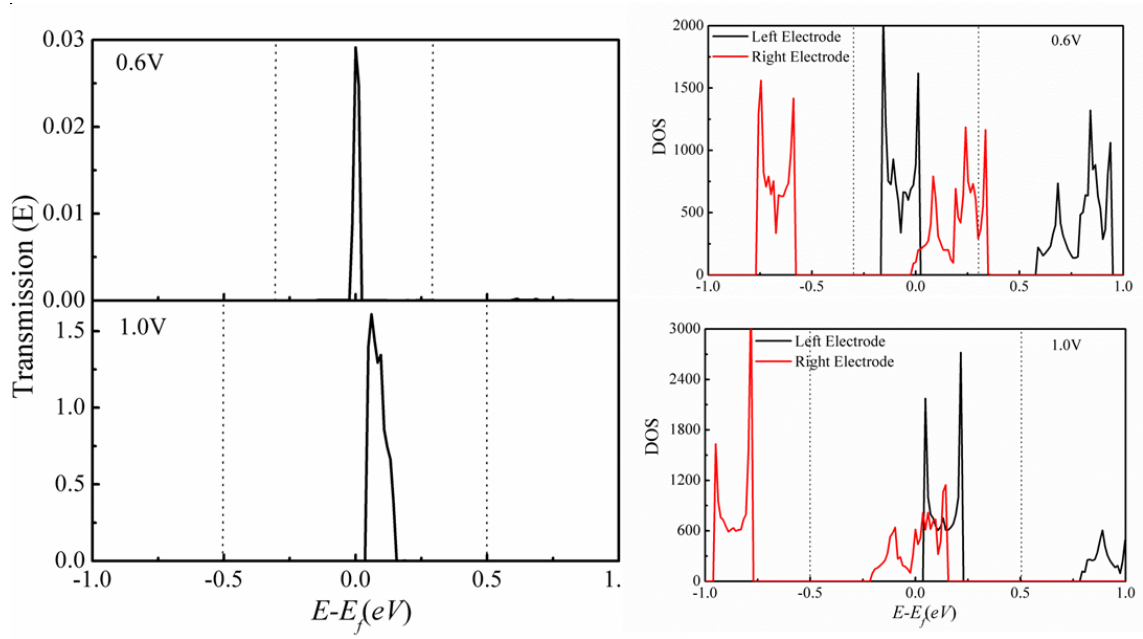

(d) *trans*-BN-Benzo-CMP

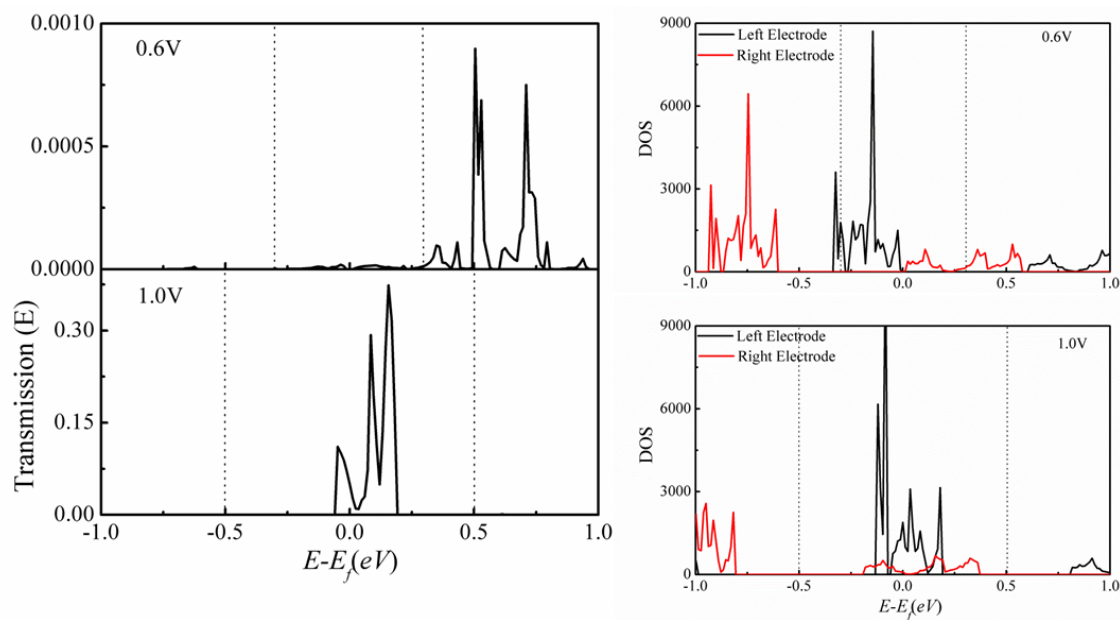

(e) *cis*-BN-Aza-CMP

**Figure S1.** Computed transmission spectra and the corresponding DOS of left electrode and right electrode at different bias for (a) Benzo-CMP, (b) Aza-CMP, (c) *cis*-BN-Benzo-CMP, (d) *trans*-BN-Benzo-CMP, and (e) *cis*-BN-Aza-CMP.
